# Supplementary material for: Prenatal Exposure to Persistent Organochlorines and Childhood Obesity in the U.S. Collaborative Perinatal Project
Source: PubMed Central journal article supplement (PMC3764072; doi:10.1289/ehp.1205901), 2013-06-25
Supplement: ehp.1205901.s001.pdf [file ehp.1205901.s001.pdf]

**Supplemental Material**

**Prenatal Exposure to Persistent Organochlorines and Childhood Obesity in the U.S. Collaborative Perinatal Project**

Lea A. Cupul-Uicab, Mark A. Klebanoff, John W. Brock, Matthew P. Longnecker

Corresponding author:

Center for Population Health Research, National Institute of Public Health, Avenida

Universidad 655, Cuernavaca, Morelos 62100, Mexico; e-mail: [lea.cupul@insp.mx](mailto:lea.cupul@insp.mx);

[cupuluicabl@niehs.nih.gov](mailto:cupuluicabl@niehs.nih.gov); phone +52(777)329-3000 Ext. 3204

## Contents

|                                                                                                                                                                                                                                   |    |
|-----------------------------------------------------------------------------------------------------------------------------------------------------------------------------------------------------------------------------------|----|
| Multiple imputation .....                                                                                                                                                                                                         | 3  |
| Supplemental Material, Table S1. Association of prenatal exposure to PCBs and BMI (kg/m <sup>2</sup> ) at age 7 years in the US CPP, stratified by maternal smoking .....                                                         | 4  |
| Supplemental Material, Table S2. Associations of prenatal exposure to organochlorines and BMI at age 7 years in the US CPP, stratified by child's sex .....                                                                       | 5  |
| Supplemental Material, Table S3. Associations of prenatal exposure to organochlorines and BMI at age 7 years among non-breastfed children from the US CPP .....                                                                   | 6  |
| Supplemental Material, Table S4. Associations of prenatal exposure to organochlorines and BMI at age 7 years among children with birth weight >10th percentile for gestational age in the US CPP .....                            | 7  |
| Supplemental Material, Table S5. Associations between maternal exposure to persistent organochlorines (per interquartile increase) and offspring's body size in the CPP, 1959-1965. Excluding preterm born and SGA children ..... | 8  |
| Supplemental Material, Table S6. Associations between maternal exposure to persistent organochlorines (per interquartile increase) and offspring's body size in the CPP, 1959-1965. Restricted to non-breastfed children .....    | 9  |
| Supplemental Material, Table S7. Summary of studies on body size in relation to prenatal exposure to persistent organochlorines .....                                                                                             | 10 |
| References .....                                                                                                                                                                                                                  | 14 |

## **Multiple imputation**

Multiple imputation by chained equations (MICE) (van Buuren et al. 1999) were performed to impute values for any covariate with missing data [i.e. maternal pre-pregnancy BMI (n=144), smoking (n=11), pregnancy weight gain (n=8), and birth order (n=2)]. For the imputation procedure we included all maternal and child characteristic listed in Table 1 (except maternal and child BMI), maternal weight before pregnancy and height, week of gestation at enrollment in the CPP, child's exact age at the 7 year examination, all organochlorines, total cholesterol and triglycerides, selection status (i.e., sex-specific birth defects, random sample), and study center. A total of 10 imputed datasets were generated using 20 cycles per imputation (van Buuren et al. 1999); the main analyses were repeated using the imputed data.

**Supplemental Material, Table S1.** Association of prenatal exposure to PCBs and BMI (kg/m<sup>2</sup>) at age 7 years in the US CPP, stratified by maternal smoking

| Chemical<br>( $\mu\text{g/L}$ ) | n    | Mother smoked during pregnancy |     | <i>p</i> -<br>interaction* |      |
|---------------------------------|------|--------------------------------|-----|----------------------------|------|
|                                 |      | No                             | Yes |                            |      |
|                                 |      | $\beta^a$ (95%CI)              | n   | $\beta^a$ (95%CI)          |      |
| PCBs                            | 1057 | -0.09 (-0.23, 0.04)            | 858 | 0.15 (-0.09, 0.40)         | 0.09 |

BMI, body mass index; PCBs, polychlorinated biphenyls

<sup>a</sup> Interquartile increase, 1.99  $\mu\text{g/L}$ . Adjusted for total cholesterol, triglycerides, study center, mother's race, socioeconomic index, pre-pregnancy BMI, education, child's gender, child's exact age at anthropometric measurements, and birth order

\*Interaction between PCBs exposure and maternal smoking during pregnancy

**Supplemental Material, Table S2.** Associations of prenatal exposure to organochlorines and BMI at age 7 years in the US CPP, stratified by child's sex

| Chemicals<br>( $\mu\text{g/L}$ ) | IQR  | n    | Boys               |     | Girls               |     | <i>p</i> -<br>interaction* |
|----------------------------------|------|------|--------------------|-----|---------------------|-----|----------------------------|
|                                  |      |      | $\beta^a$ (95%CI)  | n   | $\beta^a$ (95%CI)   | n   |                            |
| <i>p,p'</i> -DDT                 | 7.70 | 1171 | 0.08 (-0.11, 0.26) | 732 | -0.02 (-0.23, 0.18) | 732 | 0.20                       |
| Dieldrin                         | 0.49 | 1117 | 0.29 (-0.02, 0.60) | 690 | -0.09 (-0.20, 0.03) | 690 | 0.05                       |
| HE                               | 0.50 | 1151 | 0.10 (-0.13, 0.33) | 708 | -0.16 (-0.39, 0.08) | 708 | 0.01                       |
| Oxychlorane                      | 0.37 | 1114 | 0.03 (-0.22, 0.27) | 695 | -0.10 (-0.38, 0.19) | 695 | 0.03                       |

BMI, body mass index; HE, heptachlor epoxide; IQR, interquartile range

<sup>a</sup> Increase per interquartile range. Adjusted for total cholesterol, triglycerides, study center, mother's race, socioeconomic index, pre-pregnancy BMI, education, smoking during pregnancy, child's exact age at anthropometric measurements, and birth order

\*Interaction between organochlorine exposure and child's sex

**Supplemental Material, Table S3.** Associations of prenatal exposure to organochlorines and BMI at age 7 years among non-breastfed children from the US CPP

| Chemicals ( $\mu\text{g/L}$ ) | IQR   | n    | $\beta^a$ (95%CI)   |
|-------------------------------|-------|------|---------------------|
| $\beta$ -HCH                  | 1.11  | 1461 | 0.02 (-0.07, 0.11)  |
| <i>p,p'</i> -DDE              | 19.42 | 1408 | -0.01 (-0.19, 0.16) |
| <i>p,p'</i> -DDT              | 7.70  | 1464 | 0.03 (-0.13, 0.19)  |
| Dieldrin                      | 0.49  | 1398 | 0.11 (-0.13, 0.36)  |
| HCB                           | 0.23  | 1446 | 0.04 (-0.03, 0.12)  |

$\beta$ -HCH,  $\beta$ -hexachlorocyclohexane; BMI, body mass index; HCB, hexachlorobenzene; IQR, interquartile range

<sup>a</sup> Increase per interquartile range. Adjusted for total cholesterol, triglycerides, study center, mother's race, socioeconomic index, pre-pregnancy BMI, education, smoking during pregnancy, child's sex, child's exact age at anthropometric measurements, and birth order

**Supplemental Material, Table S4.** Associations of prenatal exposure to organochlorines and BMI at age 7 years among children with birth weight >10th percentile for gestational age in the US CPP

| Chemicals ( $\mu\text{g/L}$ ) | IQR  | n    | $\beta^a$ (95%CI)  |
|-------------------------------|------|------|--------------------|
| $\beta$ -HCH                  | 1.11 | 1698 | 0.00 (-0.05, 0.05) |
| HCB                           | 0.23 | 1684 | 0.02 (-0.02, 0.07) |

$\beta$ -HCH,  $\beta$ -hexachlorocyclohexane; BMI, body mass index; HCB, hexachlorobenzene; IQR, interquartile range

<sup>a</sup> Increase per interquartile range. Adjusted for total cholesterol, triglycerides, study center, mother's race, socioeconomic index, pre-pregnancy BMI, education, smoking during pregnancy, child's sex, child's exact age at anthropometric measurements, and birth order

**Supplemental Material, Table S5.** Associations between maternal exposure to persistent organochlorines (per interquartile increase) and offspring's body size in the CPP, 1959-1965. Excluding preterm born and SGA children

| Chemicals<br>( $\mu\text{g/L}$ ) | N    | IQR   | Overweight <sup>a</sup>  | Obese                    | BMI ( $\text{kg/m}^2$ )       |
|----------------------------------|------|-------|--------------------------|--------------------------|-------------------------------|
|                                  |      |       | OR <sup>b</sup> (95% CI) | OR <sup>b</sup> (95% CI) | $\beta^{\text{b,c}}$ (95% CI) |
| $\beta$ -HCH                     | 1476 | 1.11  | 0.96 (0.82, 1.14)        | 0.88 (0.71, 1.09)        | -0.02 (-0.07, 0.04)           |
| <i>p,p'</i> -DDE                 | 1436 | 19.42 | 0.89 (0.70, 1.13)        | 0.93 (0.65, 1.34)        | -0.04 (-0.22, 0.14)           |
| <i>p,p'</i> -DDT                 | 1480 | 7.70  | 1.04 (0.80, 1.35)        | 1.19 (0.81, 1.75)        | 0.05 (-0.13, 0.22)            |
| Dieldrin                         | 1401 | 0.49  | 1.00 (0.79, 1.26)        | 1.38 (1.03, 1.85)        | 0.09 (-0.16, 0.33)            |
| HE                               | 1456 | 0.50  | 1.03 (0.77, 1.38)        | 1.08 (0.58, 2.01)        | -0.02 (-0.23, 0.19)           |
| HCB                              | 1463 | 0.23  | 1.00 (0.98, 1.03)        | 1.02 (0.99, 1.06)        | 0.02 (-0.02, 0.07)            |
| <i>t</i> -Nonachlor              | 1488 | 0.32  | 1.14 (0.84, 1.55)        | 1.04 (0.59, 1.85)        | 0.03 (-0.18, 0.23)            |
| Oxychlorodane                    | 1411 | 0.37  | 1.05 (0.74, 1.50)        | 1.31 (0.69, 2.49)        | 0.05 (-0.17, 0.28)            |
| PCBs                             | 1491 | 1.99  | 0.98 (0.79, 1.23)        | 0.97 (0.61, 1.54)        | 0.01 (-0.14, 0.16)            |

$\beta$ -HCH,  $\beta$ -hexachlorocyclohexane; BMI, body mass index; HCB, hexachlorobenzene; HE, heptachlor epoxide; IQR, interquartile range; PCBs, polychlorinated biphenyls

<sup>a</sup> Includes overweight and obese

<sup>b</sup> Adjusted for total cholesterol, triglycerides, study center, mother's race, socioeconomic index, education, smoking during pregnancy, pre-pregnancy BMI, child's gender and birth order

<sup>c</sup> Additionally adjusted for child's exact age at anthropometric measurements



**Supplemental Material, Table S6.** Associations between maternal exposure to persistent organochlorines (per interquartile increase) and offspring's body size in the CPP, 1959-1965. Restricted to non-breastfed children

| Chemicals<br>( $\mu\text{g/L}$ ) | N    | IQR   | Overweight <sup>a</sup>  | Obese                    | BMI ( $\text{kg/m}^2$ ) |
|----------------------------------|------|-------|--------------------------|--------------------------|-------------------------|
|                                  |      |       | OR <sup>b</sup> (95% CI) | OR <sup>b</sup> (95% CI) | $\beta^{b,c}$ (95% CI)  |
| $\beta$ -HCH                     | 1461 | 1.11  | 1.04 (0.89, 1.220)       | 1.05 (0.84, 1.31)        | 0.02 (-0.07, 0.11)      |
| <i>p,p'</i> -DDE                 | 1408 | 19.42 | 0.94 (0.77, 1.16)        | 1.04 (0.78, 1.39)        | -0.01 (-0.19, 0.16)     |
| <i>p,p'</i> -DDT                 | 1464 | 7.70  | 1.04 (0.84, 1.28)        | 1.21 (0.91, 1.60)        | 0.03 (-0.13, 0.19)      |
| Dieldrin                         | 1398 | 0.49  | 1.05 (0.86, 1.28)        | 1.35 (1.01, 1.81)        | 0.11 (-0.13, 0.36)      |
| HE                               | 1429 | 0.50  | 1.05 (0.78, 1.43)        | 1.06 (0.55, 2.03)        | 0.01 (-0.25, 0.27)      |
| HCB                              | 1446 | 0.23  | 0.99 (0.91, 1.08)        | 1.06 (0.96, 1.16)        | 0.04 (-0.03, 0.12)      |
| <i>t</i> -Nonachlor              | 1471 | 0.32  | 1.04 (0.78, 1.38)        | 1.08 (0.71, 1.65)        | 0.00 (-0.18, 0.18)      |
| Oxychlorodane                    | 1389 | 0.37  | 0.88 (0.61, 1.28)        | 1.03 (0.53, 2.01)        | -0.05 (-0.28, 0.18)     |
| PCBs                             | 1474 | 1.99  | 0.96 (0.76, 1.22)        | 0.97 (0.63, 1.49)        | -0.01 (-0.17, 0.15)     |

$\beta$ -HCH,  $\beta$ -hexachlorocyclohexane; BMI, body mass index; HCB, hexachlorobenzene; HE, heptachlor epoxide; IQR, interquartile range; PCBs, polychlorinated biphenyls

<sup>a</sup> Includes overweight and obese

<sup>b</sup> Adjusted for total cholesterol, triglycerides, study center, mother's race, socioeconomic index, education, smoking during pregnancy, pre-pregnancy BMI, child's gender and birth order

<sup>c</sup> Additionally adjusted for child's exact age at anthropometric measurements

**Supplemental Material, Table S7.** Summary of studies on body size in relation to prenatal exposure to persistent organochlorines

| Location<br>(children born)                                       | N                | Outcome<br>(age in years)               | Median levels ( $\mu\text{g/g}$ lipids) <sup>a</sup> and main findings |                                                   |                  |              |                   |                                                                                            |
|-------------------------------------------------------------------|------------------|-----------------------------------------|------------------------------------------------------------------------|---------------------------------------------------|------------------|--------------|-------------------|--------------------------------------------------------------------------------------------|
|                                                                   |                  |                                         | $\beta$ -HCH                                                           | <i>p,p'</i> -DDE                                  | <i>p,p'</i> -DDT | HCB          | PCBs              |                                                                                            |
| Michigan, US <sup>b</sup><br>(1950-1980)<br>(Karmaus et al. 2009) | 176<br>wome<br>n | Weight, BMI (20<br>to 50)               | 0.56 <sup>c</sup>                                                      | Statistically significant<br>increase in endpoint |                  |              | 0.31 <sup>c</sup> | Null finding                                                                               |
| New York, US <sup>b,d</sup><br>(1959-1962)<br>(Lamb et al. 2006)  | 150              | Weight (4, 7, 17)                       |                                                                        |                                                   |                  |              | 1.1               | Statistically<br>significant<br>decrease in<br>endpoint among<br>girls. Null among<br>boys |
| Philadelphia, US<br>(1959-1966)<br>(Gladen et al. 2004)           | 304<br>boys      | BMI, central<br>adiposity (10 to<br>20) | 5.7                                                                    | Null finding                                      | 1.9              | Null finding |                   |                                                                                            |
| California, US<br>(1964-1967)<br>(Hertz-Picciotto et<br>al. 2005) | 399              | Weight (5)                              |                                                                        |                                                   |                  |              | 0.62              | NS increase in<br>endpoint among<br>girls. Null among<br>boys                              |
| Michigan, US <sup>b</sup><br>(1976-1979)<br>(Blanck et al. 2002)  | 305<br>girls     | Weight (5 to 24)                        |                                                                        |                                                   |                  |              | 0.63 <sup>c</sup> | Statistically<br>significant<br>decrease in<br>endpoint                                    |

Median levels ( $\mu\text{g/g lipids}$ )<sup>a</sup> and main findings

| Location<br>(children born)                                               | N   | Outcome<br>(age in years)      | $\beta$ -HCH      | <i>p,p'</i> -DDE                                                                        | <i>p,p'</i> -DDT  | HCB                                                                          | PCBs                                                                           |
|---------------------------------------------------------------------------|-----|--------------------------------|-------------------|-----------------------------------------------------------------------------------------|-------------------|------------------------------------------------------------------------------|--------------------------------------------------------------------------------|
| North Carolina,<br>US <sup>b</sup> (1978-1982)<br>(Gladen et al.<br>2000) | 594 | Weight (10 to 17)              | 1.6               | Null among girls.<br>Statistically significant<br>increase in endpoint<br>among boys    |                   |                                                                              | 1.14<br>NS increase in<br>endpoint among<br>girls. Null among<br>boys          |
| Michigan, US <sup>b</sup><br>(1980-1981)<br>(Jacobson et al.<br>1990)     | 123 | Weight (4)                     |                   |                                                                                         |                   |                                                                              | 0.96 <sup>e,f</sup><br>Statistically<br>significant<br>decrease in<br>endpoint |
| The Netherlands <sup>b</sup><br>(1990-1992)<br>(Patandin et al.<br>1998)  | 207 | Weight change<br>(0.3 to 3.5)  |                   |                                                                                         |                   |                                                                              | 0.26<br>Null finding                                                           |
| New York State,<br>US (1996-2002)<br>(Jackson et al.<br>2010)             | 44  | WFA, WFL z-<br>score (2)       |                   |                                                                                         |                   |                                                                              | 1.17<br>Null finding                                                           |
| Menorca, Spain <sup>b</sup><br>(1997-1998)<br>(Smink et al. 2008)         | 405 | Weight, BMI<br>(6.5)           |                   |                                                                                         |                   | 0.26 <sup>f</sup><br>Statistically<br>significant<br>increase in<br>endpoint |                                                                                |
| Menorca, Spain <sup>b</sup><br>(1997-1998) (Valvi<br>et al. 2012)         | 344 | Overweight or<br>obesity (6.5) | 0.41 <sup>f</sup> | Statistically significant<br>increase in endpoint<br>in second but not third<br>tertile | 0.03 <sup>f</sup> | NS<br>increase in<br>endpoint                                                | 0.29 <sup>f</sup><br>Statistically<br>significant<br>increase in<br>endpoint   |

| Location<br>(children born)                                             | N           | Outcome<br>(age in years)                 | Median levels ( $\mu\text{g/g}$ lipids) <sup>a</sup> and main findings |                  |                     |                                                                                                                                                                                                                |  |      |                     |              |                     |                                                         |              |
|-------------------------------------------------------------------------|-------------|-------------------------------------------|------------------------------------------------------------------------|------------------|---------------------|----------------------------------------------------------------------------------------------------------------------------------------------------------------------------------------------------------------|--|------|---------------------|--------------|---------------------|---------------------------------------------------------|--------------|
|                                                                         |             |                                           | $\beta$ -HCH                                                           | <i>p,p'</i> -DDE |                     | <i>p,p'</i> -DDT                                                                                                                                                                                               |  | HCB  |                     | PCBs         |                     |                                                         |              |
| Morelos, Mexico<br>(2001-2005)<br>(Garced et al.<br>2012)               | 253         | WFA, WFL, BMI-<br>for-age z-scores<br>(1) |                                                                        |                  | 0.71 <sup>g</sup>   | Null finding                                                                                                                                                                                                   |  |      |                     |              |                     |                                                         |              |
| Chiapas, Mexico<br>(2002-2003)<br>(Cupul-Uicab et al.<br>2010)          | 788<br>boys | BMI SDS (0.4 to<br>3.2)                   |                                                                        |                  | 2.7                 | Null finding                                                                                                                                                                                                   |  | 0.3  | Null finding        |              |                     |                                                         |              |
| Flanders, Belgium<br>(2002-2004)<br>(Verhulst et al.<br>2009)           | 138         | BMI SDS (1 to 3)                          |                                                                        |                  | 0.21 <sup>e,f</sup> | Statistically significant<br>increase in endpoint<br>with interactions by<br>maternal smoking and<br>child's age. Stronger<br>associations at age 1<br>year and among<br>children whose<br>mothers ever smoked |  |      | 0.03 <sup>e,f</sup> | Null finding | 0.12 <sup>e,f</sup> | Statistically<br>significant<br>increase in<br>endpoint |              |
| Catalonia, Spain <sup>h</sup><br>(2004-2006)<br>(Mendez et al.<br>2011) | 502         | BMI-for-age z-<br>score (1.2)             | 0.02 <sup>g</sup>                                                      | Null<br>finding  | 0.13 <sup>g</sup>   | Statistically significant<br>increase in endpoint<br>limited to children<br>whose mothers had<br>normal pre-pregnancy<br>weight                                                                                |  |      | 0.02 <sup>g</sup>   | Null finding | 0.04 <sup>g</sup>   | Null finding                                            |              |
| Present study, US<br>(1959-1965)                                        | 1,809       | BMI, overweight,<br>obesity (7)           | 0.18                                                                   | Null<br>finding  | 3.12                | Null finding                                                                                                                                                                                                   |  | 1.17 | Null finding        | 0.03         | Null finding        | 0.34                                                    | Null finding |

BMI, body mass index;  $\beta$ -HCH,  $\beta$ -hexachlorocyclohexane; HCB, hexachlorobenzene; NS, no statistically significant; PCBs, total polychlorinated biphenyls; SDS, standard deviation scores; WFA, weight-for-age; WFL, weight-for-length

<sup>a</sup> From maternal serum, unless otherwise noted

<sup>b</sup> Lipid adjusted levels were estimated assuming 8 g lipid/L in maternal serum or 2.6 g lipid/L in cord (Longnecker et al. 2003; Valvi et al. 2012)

<sup>c</sup> Prenatal exposure was extrapolated or estimated

<sup>d</sup> Included only African-American

<sup>e</sup> Arithmetic means

<sup>f</sup> Measured in cord serum or plasma

<sup>g</sup> Geometric means

<sup>h</sup> Exposure levels are from the subgroup defined as average/slow growers (levels were slightly higher among the rapid growers)

## References

- Blanck HM, Marcus M, Rubin C, Tolbert PE, Hertzberg VS, Henderson AK, et al. 2002. Growth in girls exposed in utero and postnatally to polybrominated biphenyls and polychlorinated biphenyls. *Epidemiology* 13(2):205-210.
- Cupul-Uicab LA, Hernandez-Avila M, Terrazas-Medina EA, Pennell ML, Longnecker MP. 2010. Prenatal exposure to the major DDT metabolite 1,1-dichloro-2,2-bis(p-chlorophenyl)ethylene (DDE) and growth in boys from Mexico. *Environ Res* 110(6):595-603.
- Garced S, Torres-Sanchez L, Cebrian ME, Claudio L, Lopez-Carrillo L. 2012. Prenatal dichlorodiphenyldichloroethylene (DDE) exposure and child growth during the first year of life. *Environ Res* 113:58-62.
- Gladen BC, Klebanoff MA, Hediger ML, Katz SH, Barr DB, Davis MD, et al. 2004. Prenatal DDT exposure in relation to anthropometric and pubertal measures in adolescent males. *Environ Health Perspect* 112(17):1761-1767.
- Gladen BC, Ragan NB, Rogan WJ. 2000. Pubertal growth and development and prenatal and lactational exposure to polychlorinated biphenyls and dichlorodiphenyl dichloroethene. *J Pediatr* 136(4):490-496.
- Hertz-Picciotto I, Charles MJ, James RA, Keller JA, Willman E, Teplin S. 2005. In utero polychlorinated biphenyl exposures in relation to fetal and early childhood growth. *Epidemiology* 16(5):648-656.
- Jackson LW, Lynch CD, Kostyniak PJ, McGuinness BM, Louis GM. 2010. Prenatal and postnatal exposure to polychlorinated biphenyls and child size at 24 months of age. *Reprod Toxicol* 29(1):25-31.
- Jacobson JL, Jacobson SW, Humphrey HE. 1990. Effects of exposure to PCBs and related compounds on growth and activity in children. *Neurotoxicol Teratol* 12(4):319-326.
- Karmaus W, Osuch JR, Eneli I, Mudd LM, Zhang J, Mikucki D, et al. 2009. Maternal levels of dichlorodiphenyl-dichloroethylene (DDE) may increase weight and body mass index in adult female offspring. *Occup Environ Med* 66(3):143-149.

- Lamb MR, Taylor S, Liu X, Wolff MS, Borrell L, Matte TD, et al. 2006. Prenatal exposure to polychlorinated biphenyls and postnatal growth: a structural analysis. *Environ Health Perspect* 114(5):779-785.
- Longnecker MP, Wolff MS, Gladen BC, Brock JW, Grandjean P, Jacobson JL, et al. 2003. Comparison of polychlorinated biphenyl levels across studies of human neurodevelopment. *Environ Health Perspect* 111(1):65-70.
- Mendez MA, Garcia-Esteban R, Guxens M, Vrijheid M, Kogevinas M, Goni F, et al. 2011. Prenatal organochlorine compound exposure, rapid weight gain, and overweight in infancy. *Environ Health Perspect* 119(2):272-278.
- Patandin S, Koopman-Esseboom C, de Ridder MA, Weisglas-Kuperus N, Sauer PJ. 1998. Effects of environmental exposure to polychlorinated biphenyls and dioxins on birth size and growth in Dutch children. *Pediatr Res* 44(4):538-545.
- Smink A, Ribas-Fito N, Garcia R, Torrent M, Mendez MA, Grimalt JO, et al. 2008. Exposure to hexachlorobenzene during pregnancy increases the risk of overweight in children aged 6 years. *Acta Paediatr* 97(10):1465-1469.
- Valvi D, Mendez MA, Martinez D, Grimalt JO, Torrent M, Sunyer J, et al. 2012. Prenatal concentrations of polychlorinated biphenyls, DDE, and DDT and overweight in children: a prospective birth cohort study. *Environ Health Perspect* 120(3):451-457.
- van Buuren S, Boshuizen HC, Knook DL. 1999. Multiple imputation of missing blood pressure covariates in survival analysis. *Statistics in medicine* 18(6):681-694.
- Verhulst SL, Nelen V, Hond ED, Koppen G, Beunckens C, Vael C, et al. 2009. Intrauterine exposure to environmental pollutants and body mass index during the first 3 years of life. *Environ Health Perspect* 117(1):122-126.
